# Supplementary material
Source: PubMed Central journal article supplement (PMC2945540)

## Supplementary Figures

### **Supplementary Figure Legends:**

**Supplementary Figure S1:** Analysis of the occupancies of histones H2B (A) and H3 (B) at the *GALI* core promoter and ORF in the *RTT109* deletion mutant and its isogenic wild type equivalent. Both the wild type and mutant strains were initially grown in YPR up to an OD<sub>600</sub> of 0.9, and then switched to galactose-containing growth medium for immediate formaldehyde-based *in vivo* crosslinking. Immunoprecipitations were performed using an anti-H3 antibody (Ab-1791) against histone H3, and an anti-Flag antibody against the Flag-epitope attached to histone H2B. The ChIP signal in the wild type strain was set to 100, and the ChIP signal in *Δrtt109* was normalized with respect to 100. WT, wild type.

**Supplementary Figure S2:** Analysis of histone H3 K56 acetylation at *GALI* in the *RTT109* deletion mutant and its isogenic wild type equivalent in galactose/dextrose-containing growth medium. Immunoprecipitation was performed as described previously (1).

**Supplementary Figure S3:** Analysis of histone eviction from *GALI* upon transcriptional induction using dual crosslinking ChIP assay by formaldehyde and EGS [ethylene glycolbis(succinimidyl succinate)] as described previously (2). Yeast cells were grown in YPR up to an OD<sub>600</sub> of 0.9, and then switched to galactose-containing growth medium for transcriptional induction prior to dual crosslinking by EGS (1.5 mM final concentration) for 1<sup>st</sup> 15 min, and subsequently by formaldehyde (1% final concentration) for another 15 min as described previously (2). Immunoprecipitation was performed as in Supplementary Figure S1.

**Supplementary Figure S4:** Analysis of RNA polymerase II association with the *GALI* and *ADHI* ORFs in the *RTT109* deletion mutant and its isogenic wild type equivalent. Both the wild type and mutant strains were grown in YPG up to an OD<sub>600</sub> of 1.0 prior to formaldehyde-based crosslinking. Immunoprecipitation was performed using 8WG16

antibody (Covance, Inc.) against the carboxy-terminal domain of the Rpb1p subunit of RNA polymerase II.

**Supplementary Figure S5:** Association of RNA polymerase II with *GALI* following transcriptional termination. **(A)** Association of RNA polymerase II with the *GALI* coding sequence is impaired following transcriptional termination in the wild type strain. **(B)** Association of RNA polymerase II with the *GALI* core promoter is impaired following transcriptional termination in the wild type strain.

**Supplementary Figure S6:** Analysis of histone H3 at *GALI* in the *RTT109* deletion mutant and its isogenic wild type equivalent under the growth conditions as mentioned below the histogram.

**References:**

1. Schneider, J., Bajwa, P., Johnson, F. C., Bhaumik, S. R., Shilatifard, A. (2006) Rtt109 is required for proper H3K56 acetylation: a chromatin mark associated with the elongating RNA polymerase II. *J Biol Chem.* **281**, 37270-37274.
2. Zeng, P. Y., Vakoc, C. R., Chen, Z. C., Blobel, G. A., and Berger, S. L. (2006) In vivo dual cross-linking for identification of indirect DNA-associated proteins by chromatin immunoprecipitation. *Biotechniques* 41, 694, 696, 698.

Supplementary Figure S1:

**(A)**

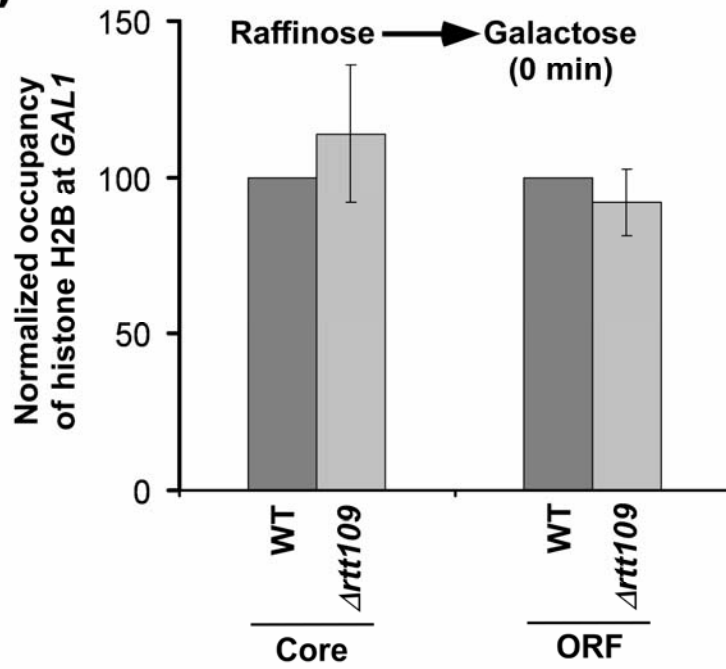

**(B)**

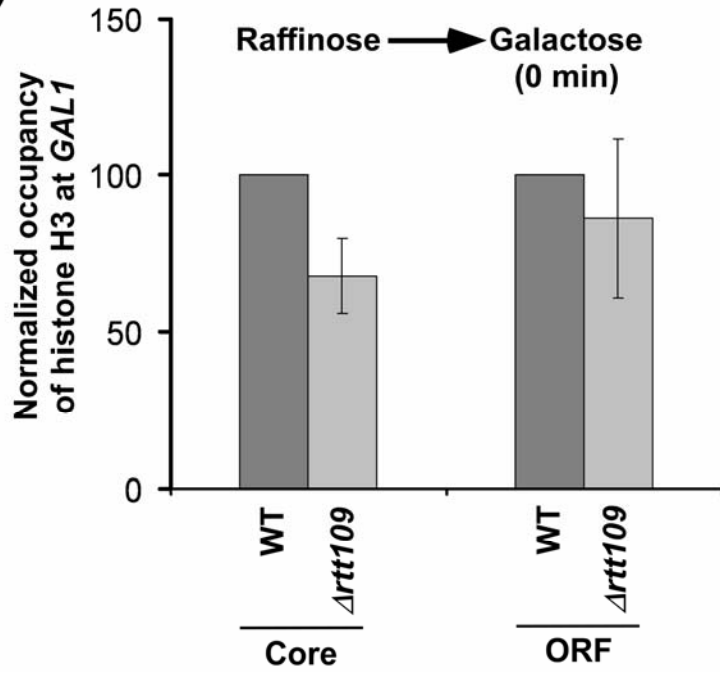

Supplementary Figure S2:

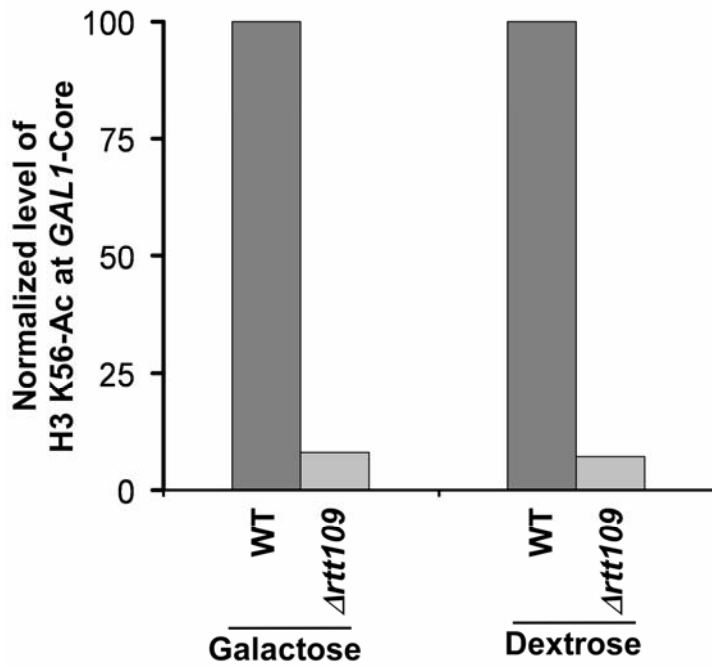

Supplementary Figure S3:

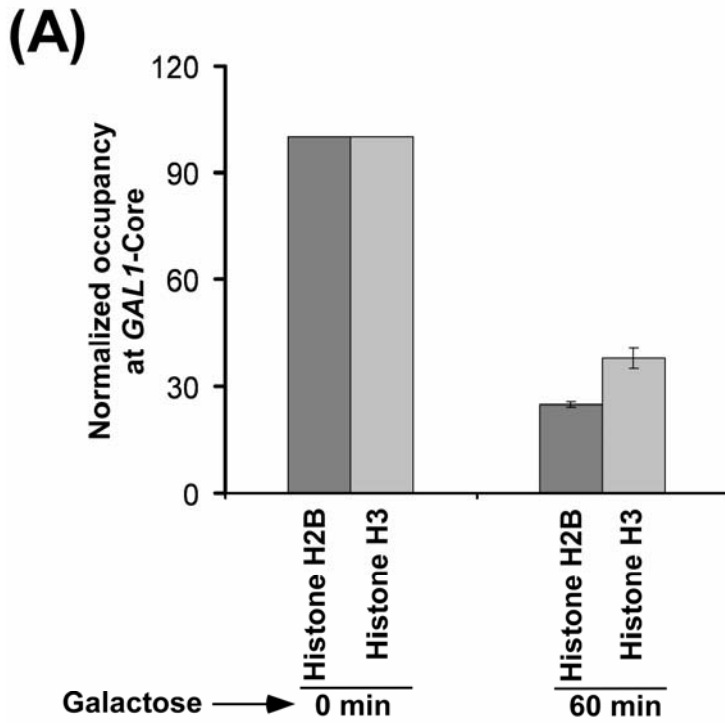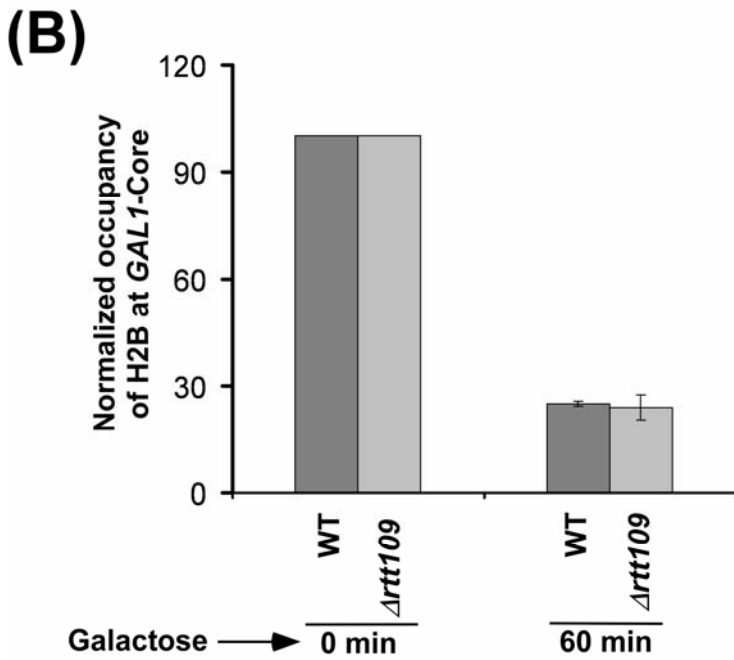

Supplementary Figure S4:

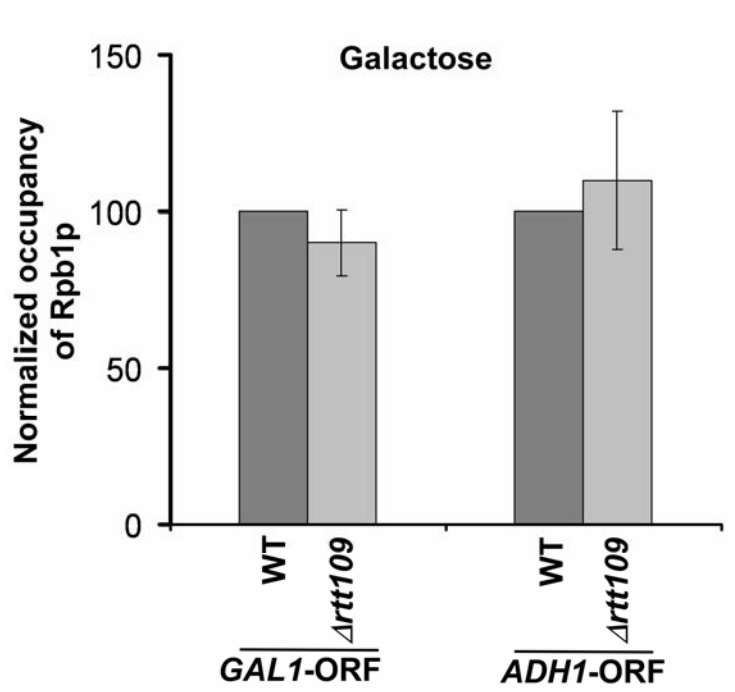

Supplementary Figure S5:

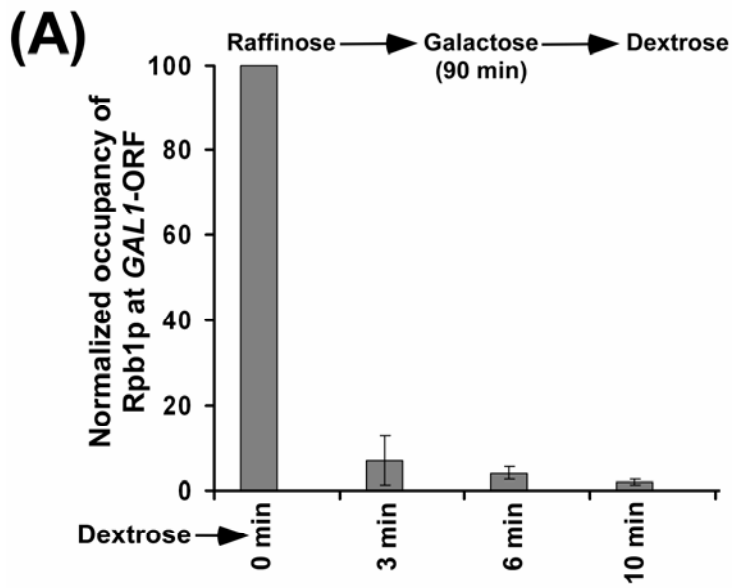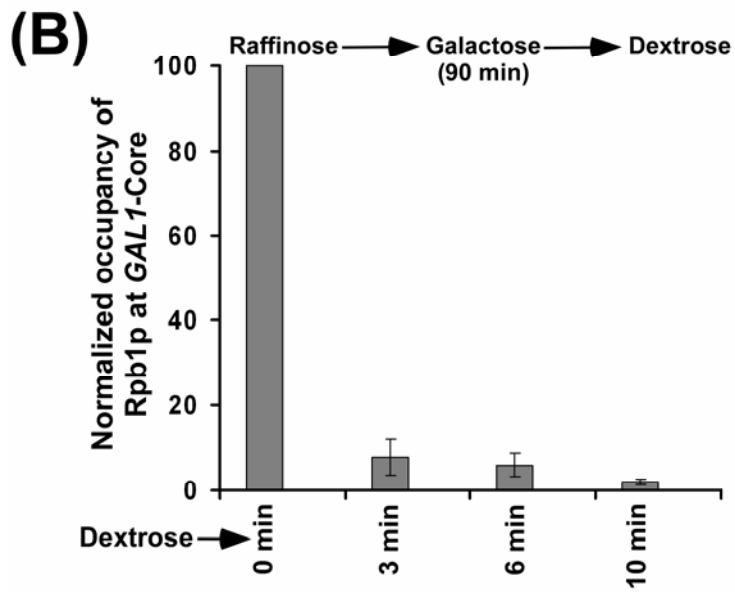

Supplementary Figure S6:

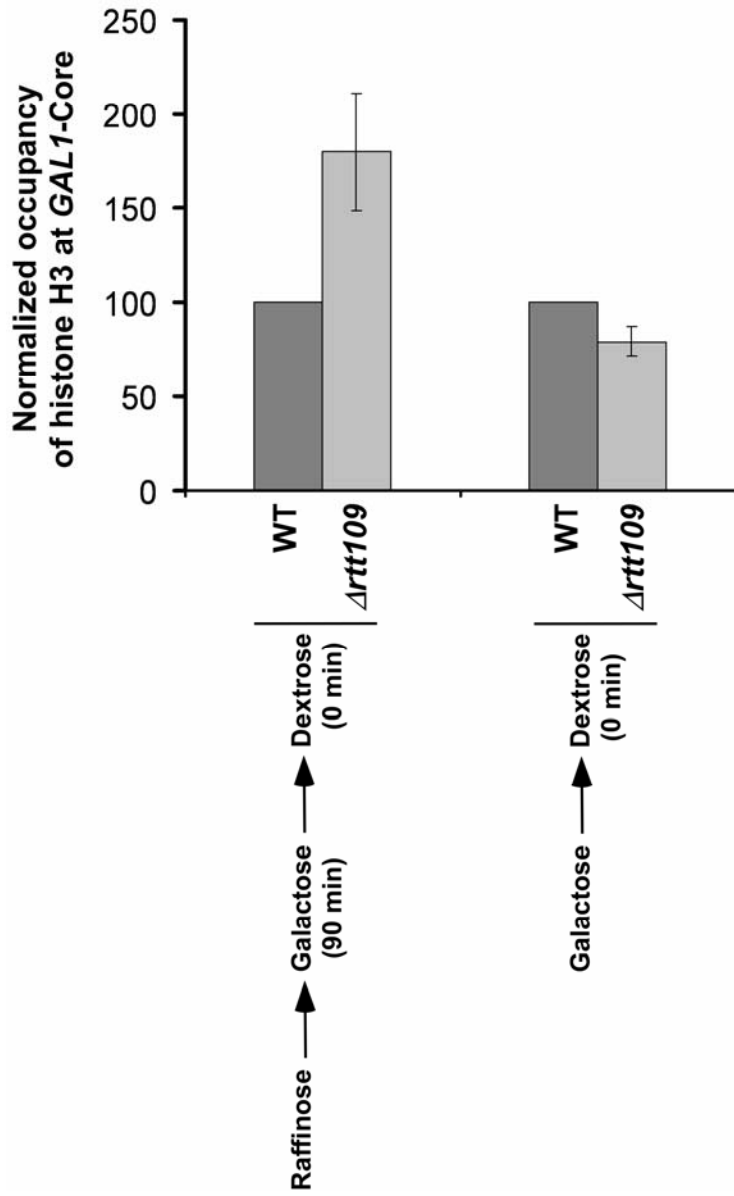

Supplement: supp_M110.113225_jbc.M110.113225-1.pdf [file supp_M110.113225_jbc.M110.113225-1.pdf]
